# Supplementary material
Source: PubMed Central journal article supplement (PMC7159454)

**Figure S1** Boxplots showing the age distribution in 91 CD-affected and 254 non-affected Holstein cattle. *APOB*-genotypes are shown as wild-type (CDF), heterozygous mutant (CDC) and homozygous mutant (CDS). The number of animals per group are shown below the boxplots (73 CDS affected and 18 CDC affected; 36 CDC non-affected and 218 CDF non-affected). Different capital letters above the box plots indicate significant differences between the groups ( $P < 0.05$ ).

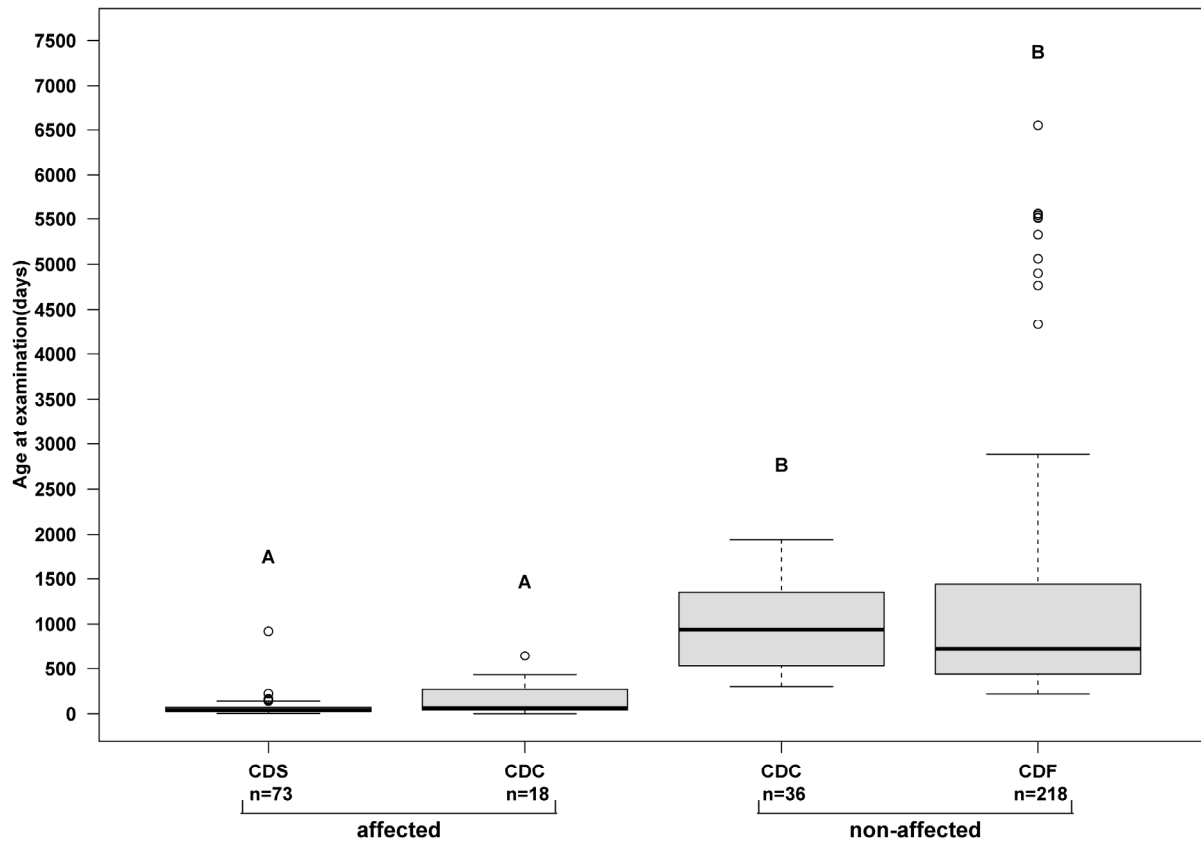

Supplement: AGE-50-372-s001.pdf [file AGE-50-372-s001.pdf]
