# Supplementary material
Source: PubMed Central journal article supplement (PMC7159454)
Supplement: AGE-50-372-s003.pdf [file AGE-50-372-s003.pdf]

**Table S2** Output of the Tukey test showing the pairwise comparisons in detail. The *APOB* genotypes are shown as CDF (non-carrier), CDC (heterozygous carrier), and CDS (homozygous carrier).

| Compared groups                              | Total Cholesterol (mmol/L) |       |         |         | Triglycerides (mmol/L) |       |         |         |
|----------------------------------------------|----------------------------|-------|---------|---------|------------------------|-------|---------|---------|
|                                              | estimate                   | SE    | t-value | p-value | estimate               | SE    | t-value | p-value |
| CDC affected (n=9) – CDS (n=11)              | 1.126                      | 0.201 | 5.614   | <1e-04  | 0.105                  | 0.021 | 5.089   | < 0.001 |
| CDC non-affected (n=36) – CDS (n=11)         | 2.036                      | 0.154 | 13.237  | <1e-04  | 0.056                  | 0.016 | 3.506   | 0.0022  |
| CDF (n=218) – CDS (n=11)                     | 2.182                      | 0.138 | 15.819  | <1e-04  | 0.069                  | 0.014 | 4.837   | < 0.001 |
| CDC non-affected (n=36) – CDC affected (n=9) | 0.909                      | 0.166 | 5.465   | <1e-04  | -0.050                 | 0.017 | -2.897  | 0.0175  |
| CDF (n=218) – CDC affected (n=9)             | 1.056                      | 0.152 | 6.952   | <1e-04  | -0.037                 | 0.016 | -2.330  | 0.0822  |
| CDF (n=218) – CDC non-affected (n=36)        | 0.146                      | 0.080 | 1.824   | 0.2420  | 0.013                  | 0.008 | 1.595   | 0.3582  |
